# Supplementary figures and images for: Preparation of ashless cellulose paper standards for rapid determination of multi-element concentrations in airborne fine particulate matter using laser ablation inductively coupled plasma mass spectrometry
Source: Royal Society of Chemistry journal article supplement (doi:10.1039/d0ra09200b), 2021-01-01

## Supplementary material

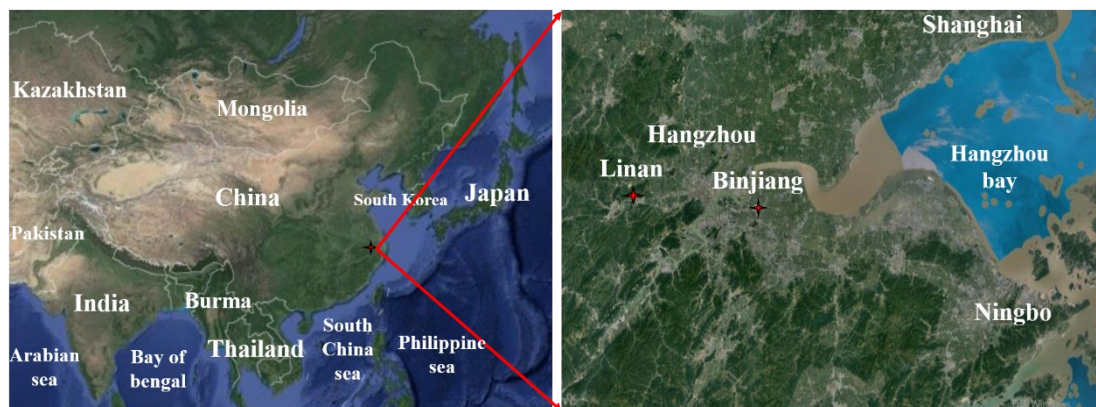

**Fig. S1.** Location of sampling points in Bin'jiang and Lin'an, China.

Supplement: d0ra09200b1.pdf [file d0ra09200b1.pdf]
